# Supplementary material for: Germline mutations in PPP2R1B in patients with a personal and family history of cancer
Source: JCI journal article supplement (doi:10.1172/jci.insight.186288), 2025-04-03
Supplement: sd2 [file 2]

# Uncropped Westerns

Figure 2C

A $\beta$  Blots

Vinculin Blots

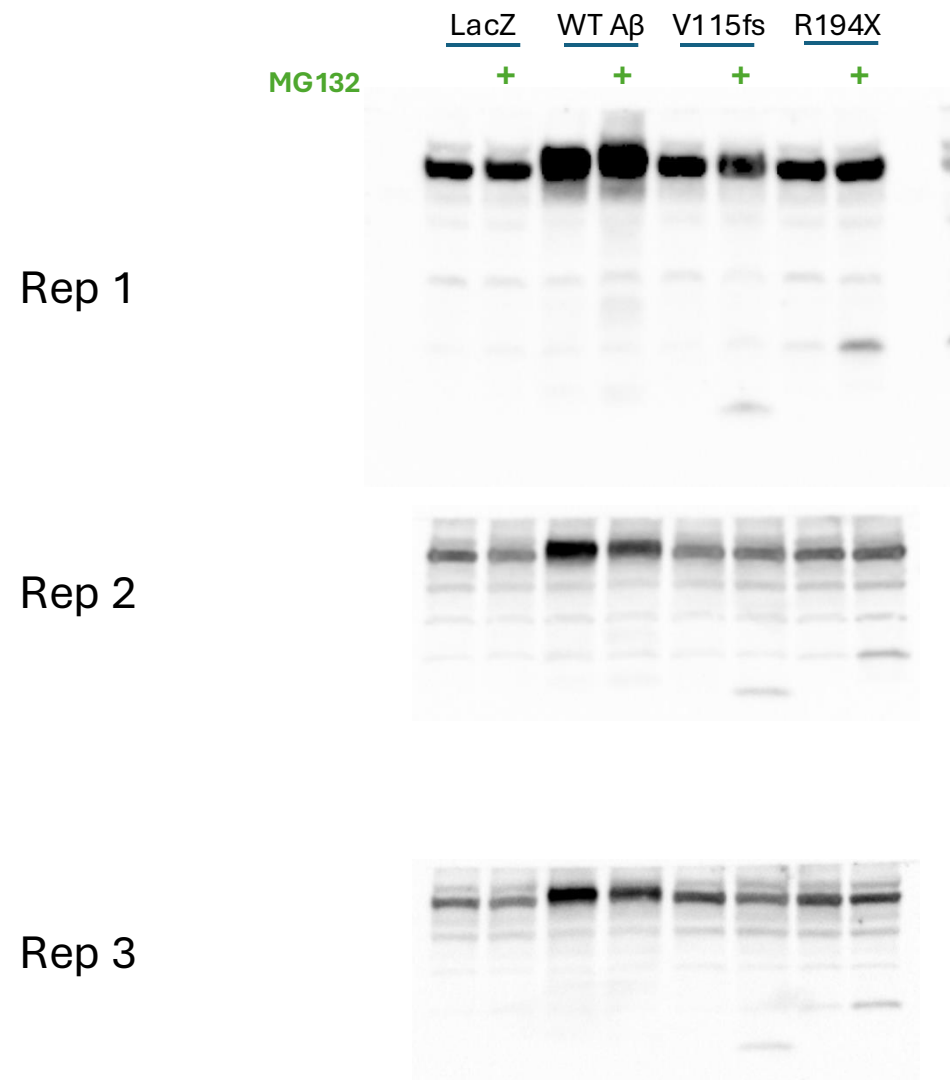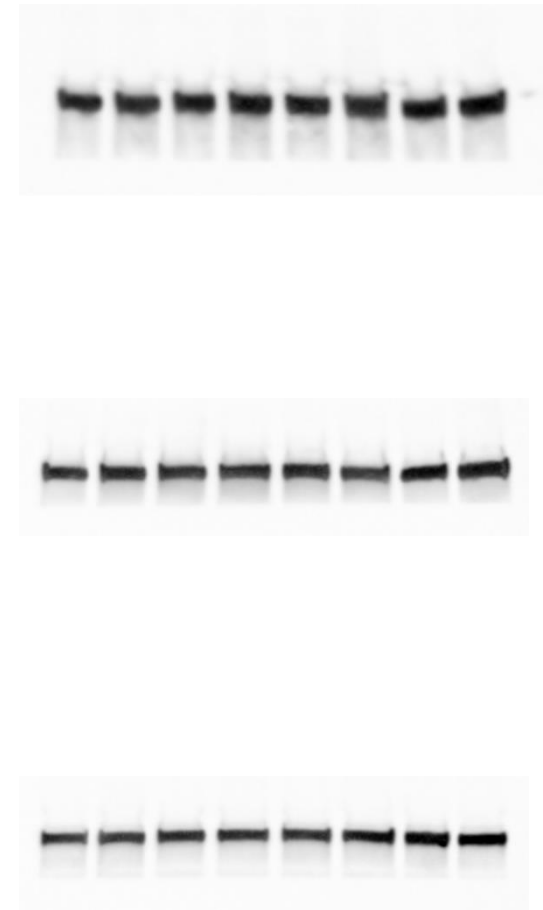

The full blot was cut and probed with anti-Vinculin or anti-A $\beta$

Figure 2D

A $\beta$  Blots

Vinculin Blots

\* other condition that was not included in the manuscript

Rep 1

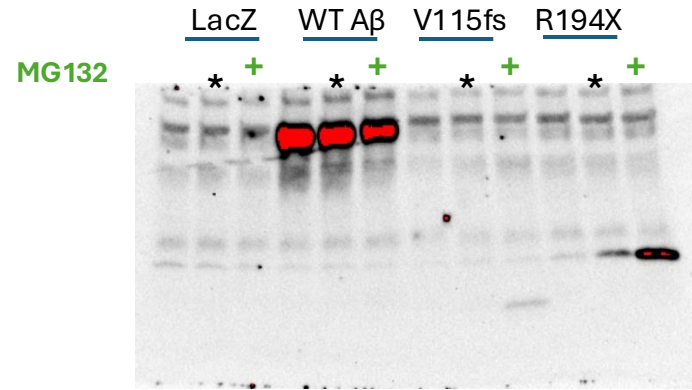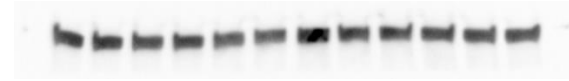

Rep 2

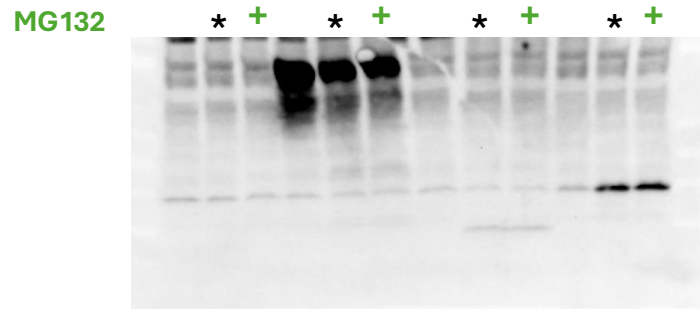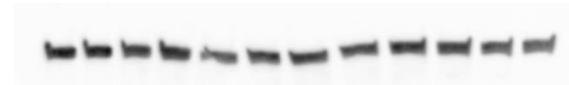

Rep 3

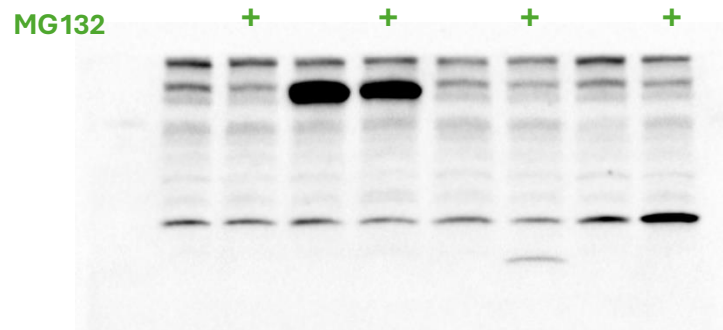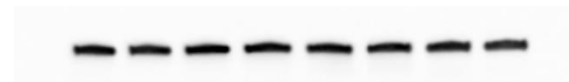

The full blot was cut and probed with anti-Vinculin or anti-A $\beta$

Figure 3B

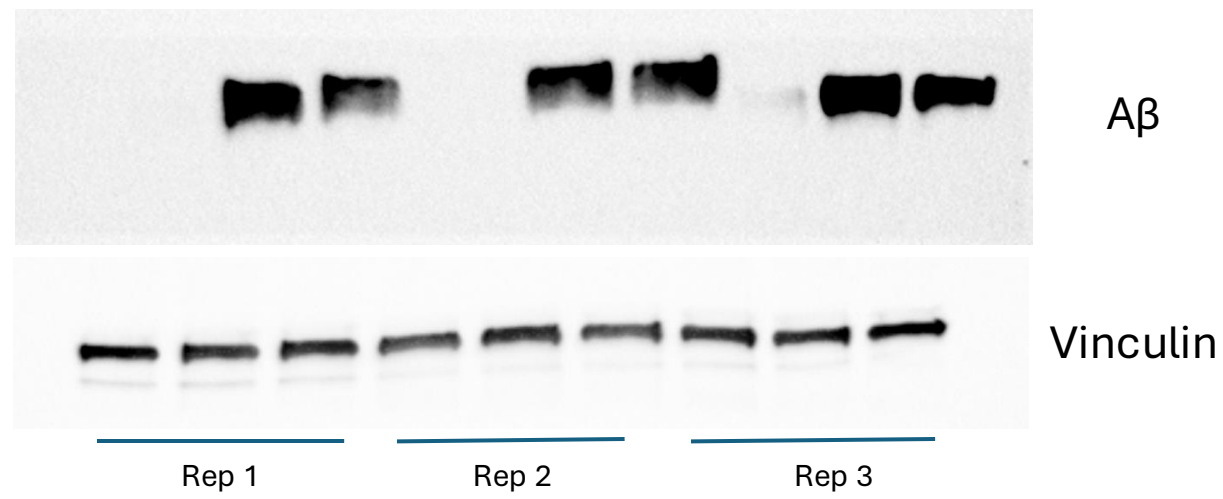

\* other mutant that was not included in the manuscript

Figure 3C

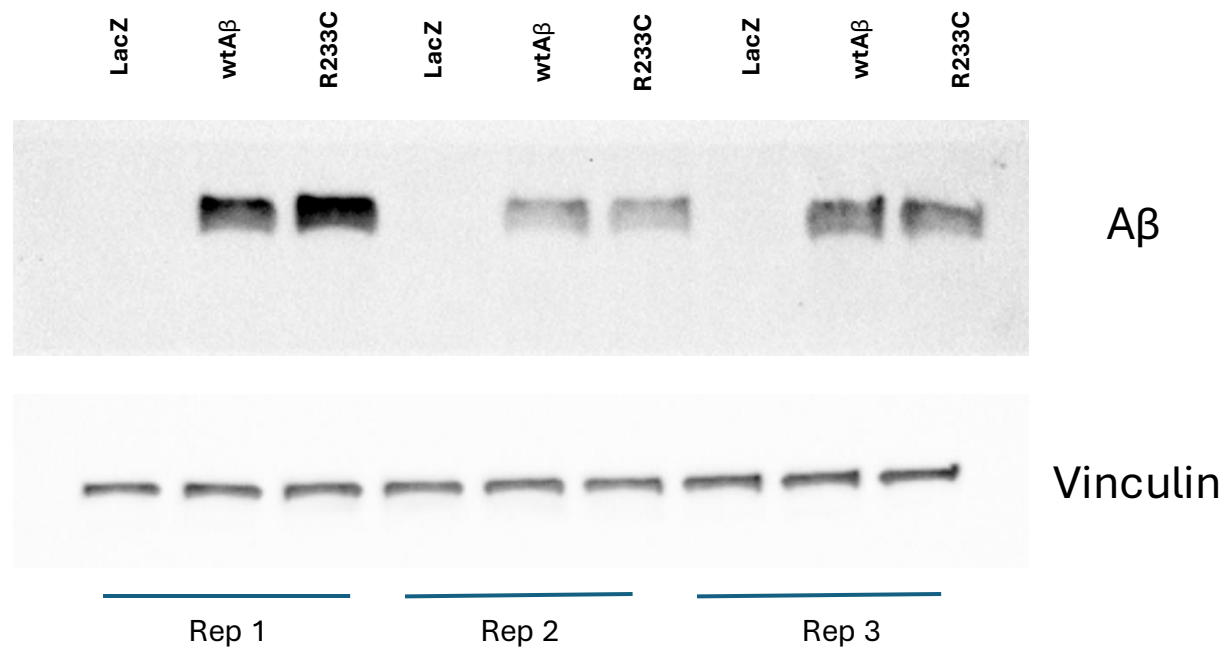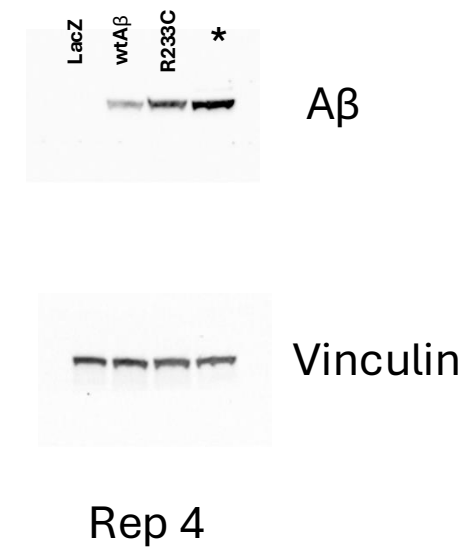

Figure 3F and 3H (tHMEC) INPUT (whole cell lysate)

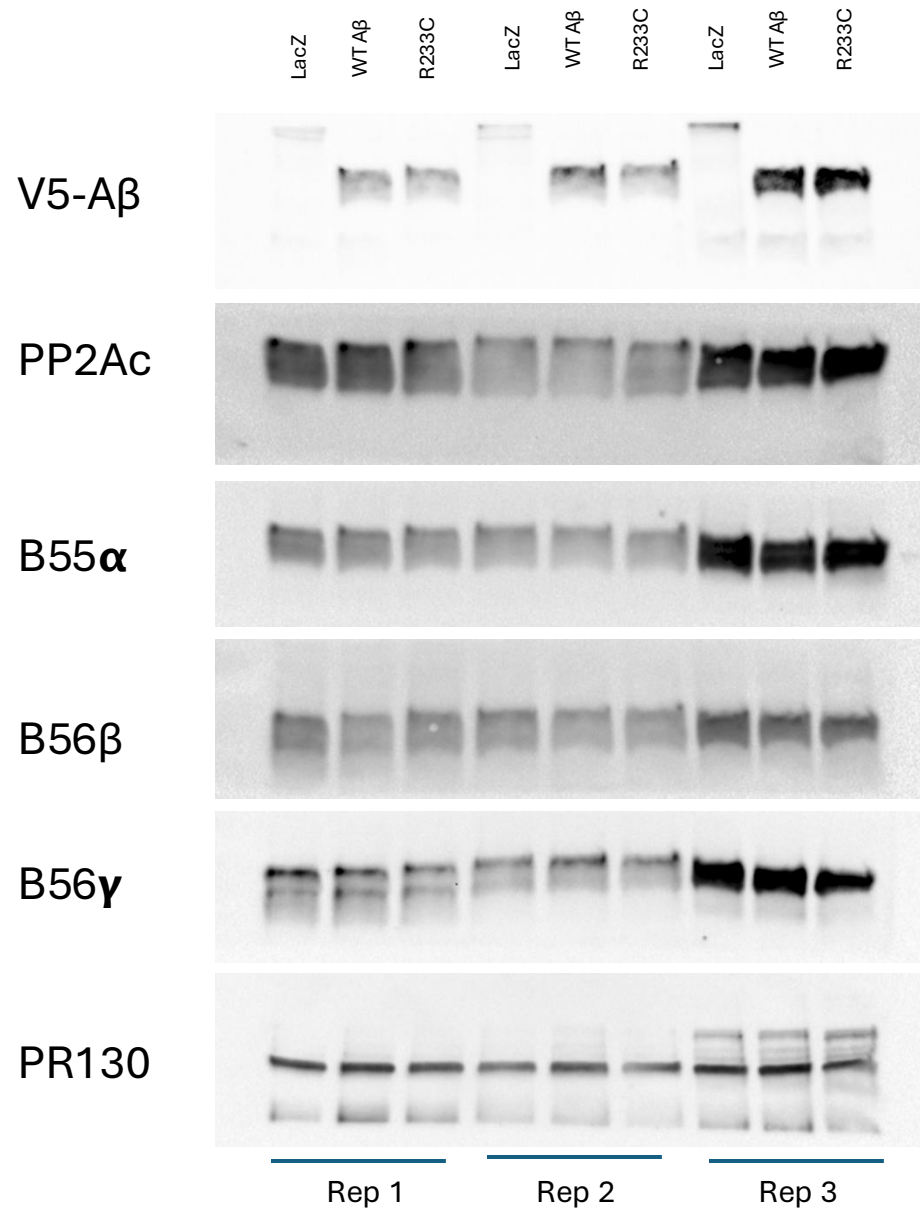

Figure 3G and 3I (MCF7) INPUT (Whole cell lysate)

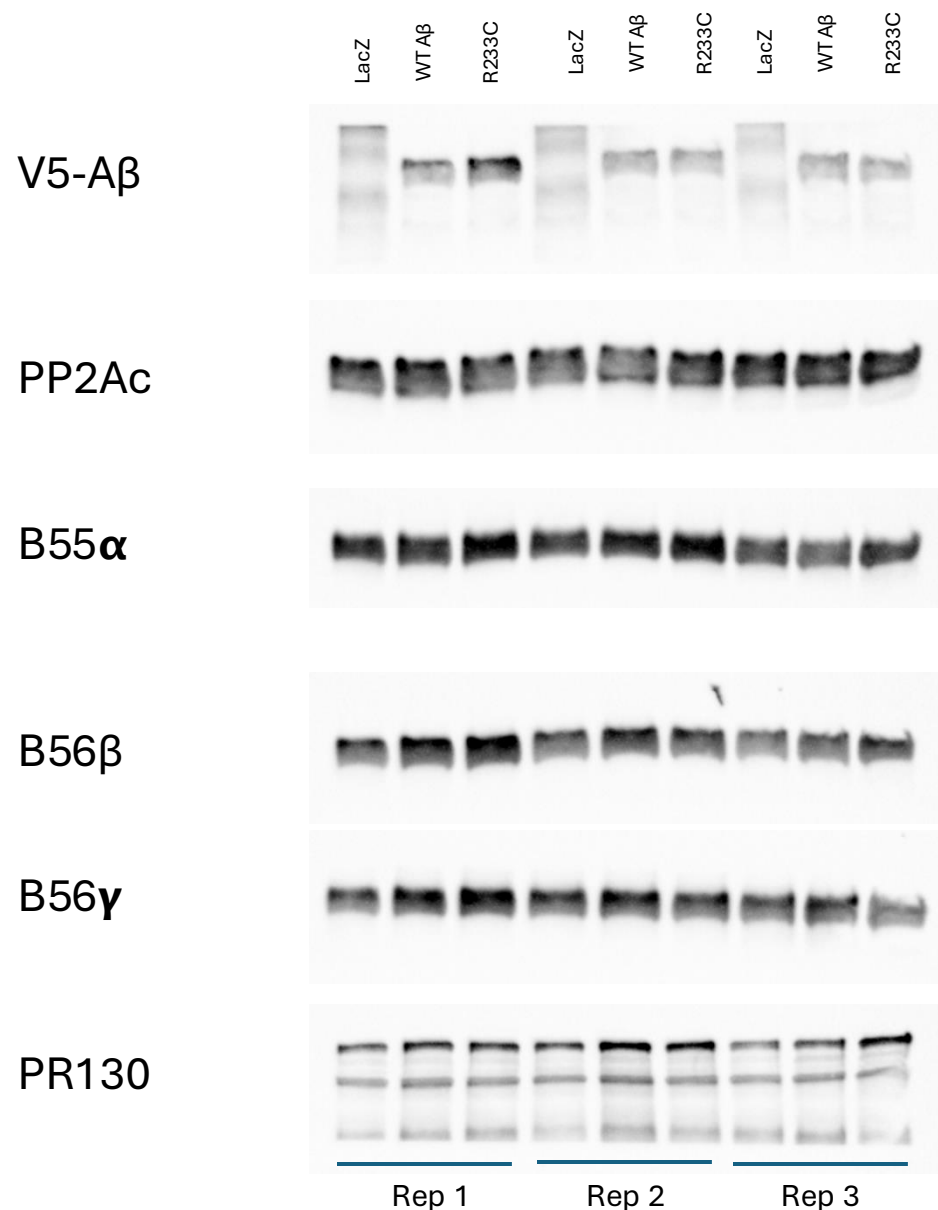

Figure 3F and 3H (tHMEC) CoIPs

\* other mutant that was not included in the manuscript

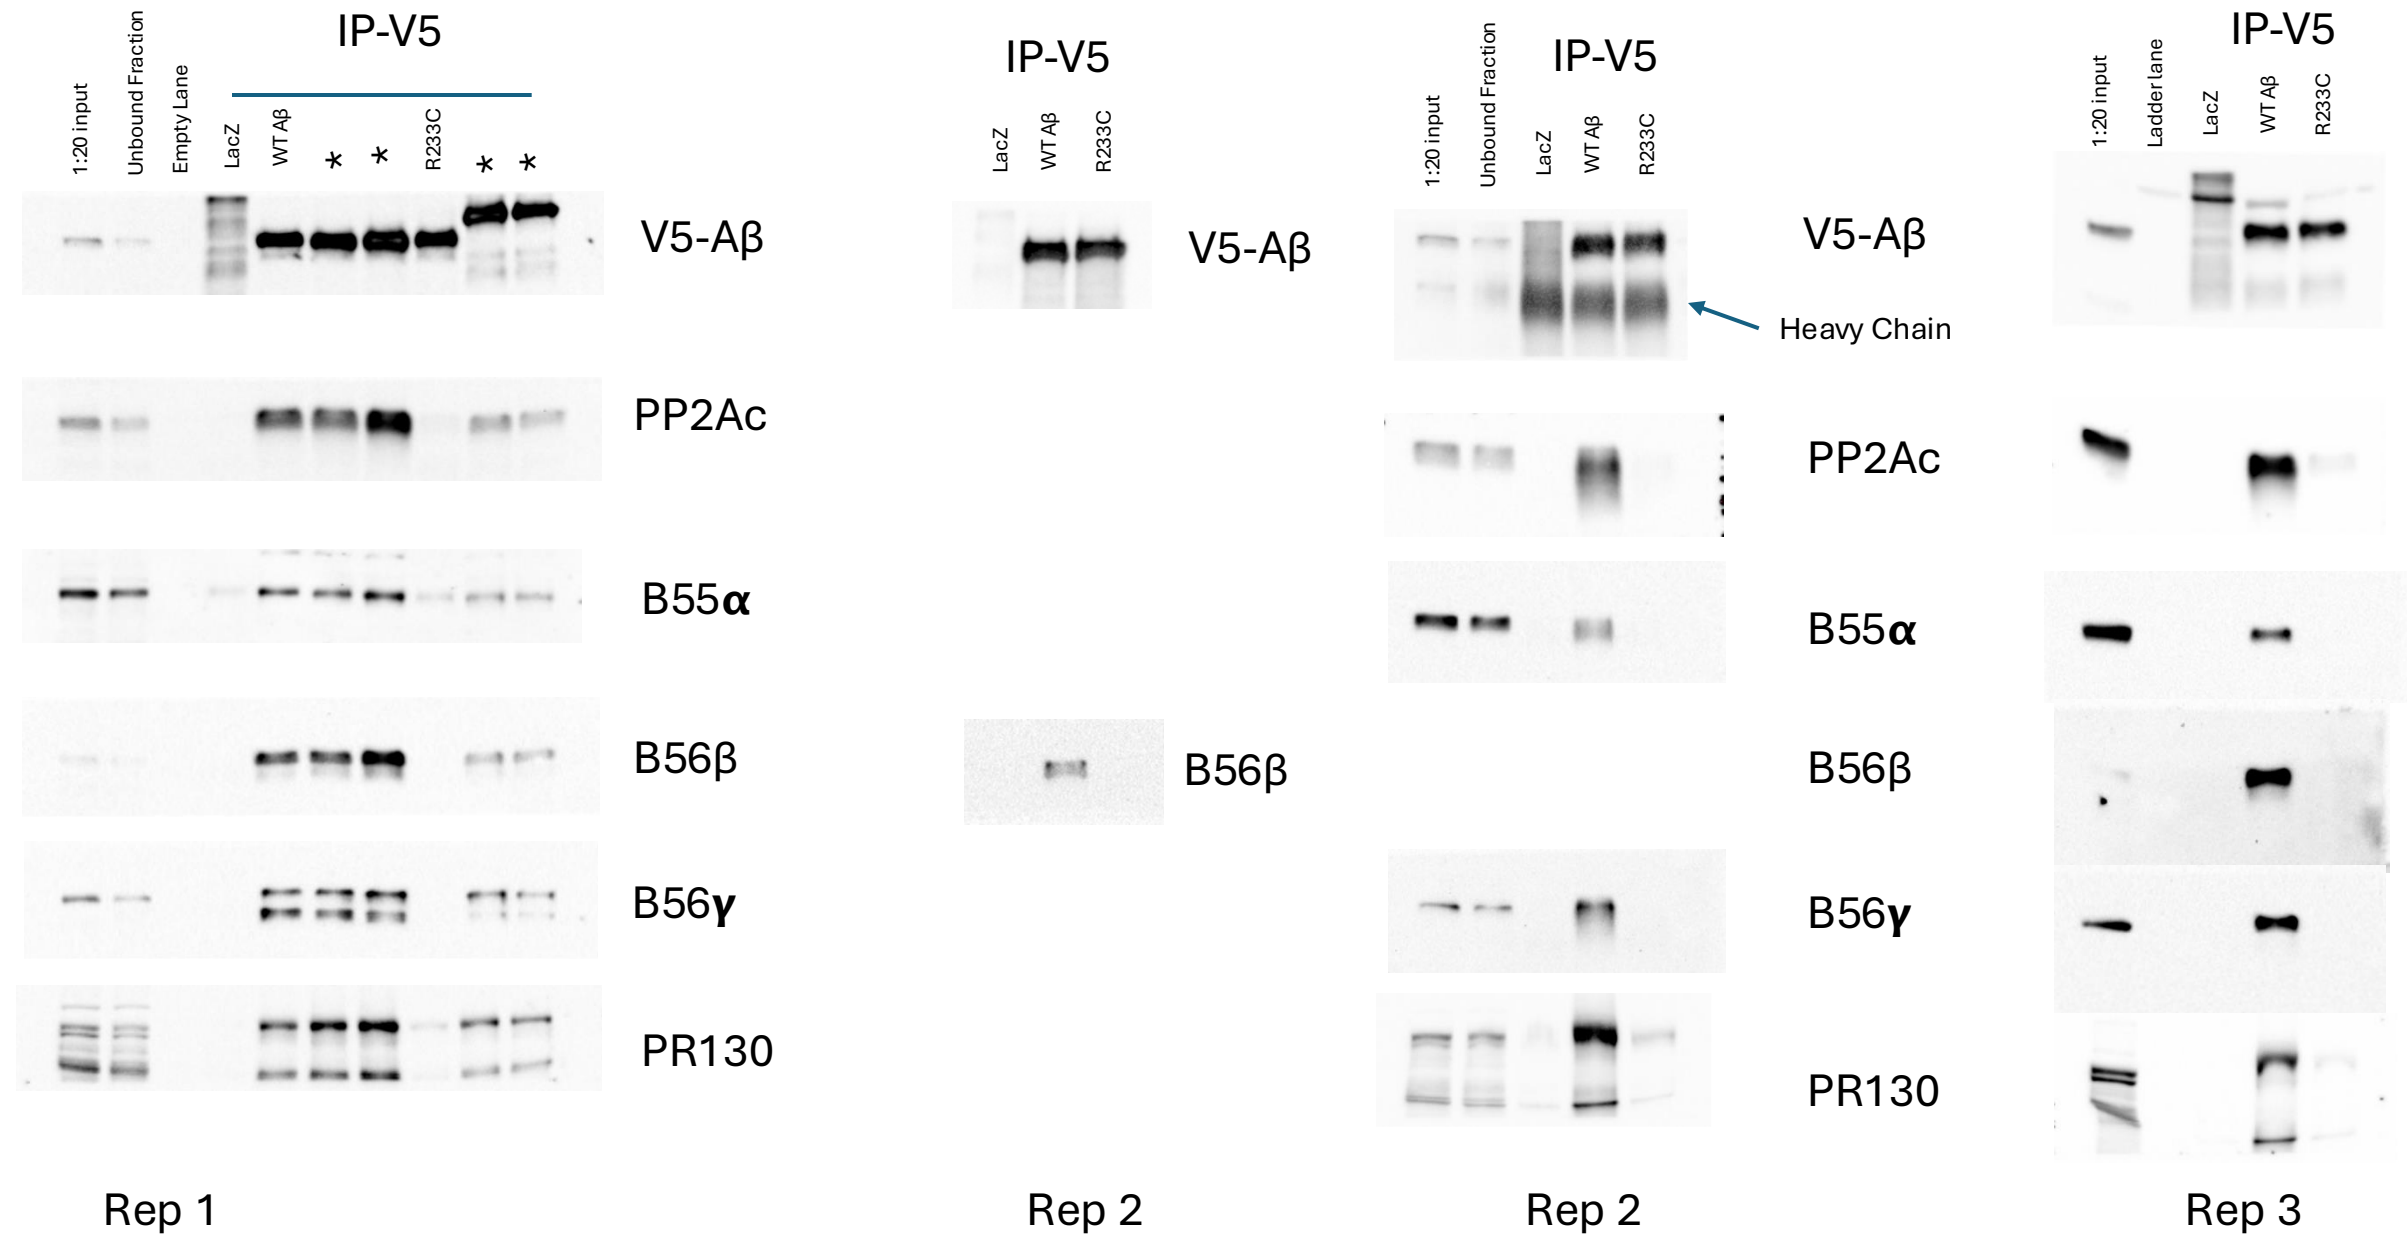

Figure 3G and 3I (MCF7) CoIPs

\* other mutant that was not included in the manuscript

IP-V5

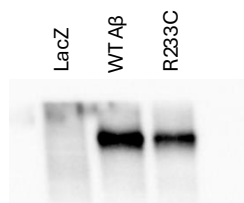

IP-V5

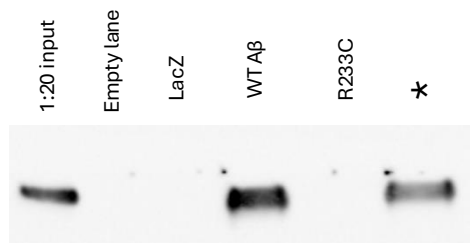

PP2Ac

B55α

B56β

B56γ

PR130

Re-run with isoform specific 2° antibody

Rep 1

Rep 1

IP-V5

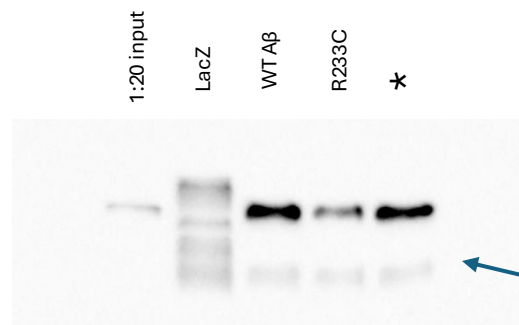

V5-Aβ  
Heavy Chain

PP2Ac

B55α

B56β

B56γ

PR130

Rep 1

IP-V5

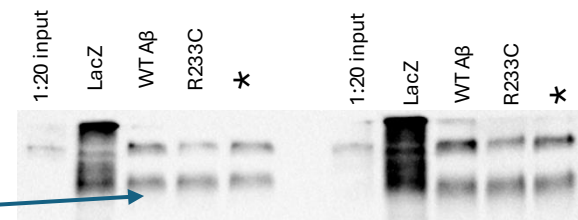

IP-V5

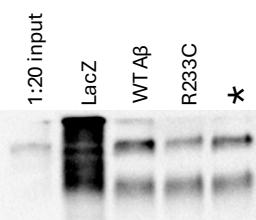

PP2Ac

B55α

B56β

B56γ

PR130

Rep 2

Rep 3
